# Supplementary material
Source: Elsevier journal article supplement (https://www.sciencedirect.com/science/article/pii/S0300893220303419)

**APPENDIX. SUPPLEMENTARY DATA****Table 1 of the supplementary data.** Global and subgroup analysis of mortality (covariate matrix)

|                 |           | Period    |           |           |           | Hospital volume |        |       |      | Age, y |       |       |       |
|-----------------|-----------|-----------|-----------|-----------|-----------|-----------------|--------|-------|------|--------|-------|-------|-------|
|                 |           | 1998-2002 | 2003-2007 | 2008-2012 | 2013-2017 | High            | I-High | I-Low | Low  | < 60   | 60-70 | 70-80 | > 80  |
| Period          | 1998-2002 | 6.7%      |           |           |           | 5.2%            | 6.8%   | 9.3%  | 7%   | 3.6%   | 5.9%  | 8.7%  | 10.9% |
|                 | 2003-2007 |           | 6.7%      |           |           | 4.9%            | 6.7%   | 7.8%  | 9.2% | 3.2%   | 5.3%  | 8%    | 11.3% |
|                 | 2008-2012 |           |           | 5.4%      |           | 4.8%            | 5.4%   | 5.9%  | 6.4% | 2.6%   | 3.9%  | 6.1%  | 8.4%  |
|                 | 2013-2017 |           |           |           | 3.8%      | 3.2%            | 3.6%   | 4.7%  | 4%   | 1.5%   | 2.7%  | 4.5%  | 5.2%  |
| Hospital volume | High      | 5.2%      | 4.9%      | 4.8%      | 3.2%      | 4.4%            |        |       |      | 1.9%   | 3.3%  | 5.2%  | 6.3%  |
|                 | I-High    | 6.8%      | 6.7%      | 5.4%      | 3.6%      |                 | 5.4%   |       |      | 2.6%   | 4.5%  | 6.3%  | 8.4%  |
|                 | I-Low     | 9.3%      | 7.8%      | 5.9%      | 4.7%      |                 |        | 6.5%  |      | 3.5%   | 5.2%  | 8.1%  | 8.3%  |
|                 | Low       | 7%        | 9.2%      | 6.4%      | 4%        |                 |        |       | 6.5% | 3.6%   | 5.5%  | 7.7%  | 9.3%  |
| Age, y          | <60       | 3.6%      | 3.2%      | 2.6%      | 1.5%      | 1.9%            | 2.6%   | 3.5%  | 3.6% | 2.7%   |       |       |       |
|                 | 60-70     | 5.9%      | 5.3%      | 3.9%      | 2.7%      | 3.3%            | 4.5%   | 5.2%  | 5.5% |        | 4.4%  |       |       |
|                 | 70-80     | 8.7%      | 8.0%      | 6.1%      | 4.5%      | 5.2%            | 6.3%   | 8.1%  | 7.7% |        |       | 6.5%  |       |
|                 | >80       | 10.9%     | 11.3%     | 8.4%      | 5.2%      | 6.3%            | 8.4%   | 8.3%  | 9.2% |        |       |       | 7.6%  |

I-High, intermediate-high; I-Low, intermediate-low.

All trend analyses within each variable were statistically significant ( $P < .05$ ). All subgroup comparisons were statistically significant at  $P < .016$  (Bonferroni's adjustment  $\alpha/3$ ).

**Table 2 of the supplementary data.** Factors associated with the use of bioprostheses

| Variable                         | Univariate analysis |        | Multivariate analysis |        |
|----------------------------------|---------------------|--------|-----------------------|--------|
|                                  | OR (95%CI)          | P      | OR (95%CI)            | P      |
| Period of time (vs 1998-2002)    |                     |        |                       |        |
| 2003-2007                        | 2.34 (2.22-2.47)    | < .001 | 2.19 (2.07-2.31)      | < .001 |
| 2008-2012                        | 3.79 (3.61-3.99)    | < .001 | 3.64 (3.45-3.86)      | < .001 |
| 2013-2017                        | 5.67 (5.4-5.96)     | < .001 | 5.51 (5.21-5.83)      | < .001 |
| Age group (vs age < 60 y)        |                     |        |                       |        |
| 60-70 y                          | 3 (2.82-3.2)        | < .001 | 2.99 (2.78-3.2)       | < .001 |
| 70-80 y                          | 11.93 (11.25-12.65) | < .001 | 12.02 (10.98-13.16)   | < .001 |
| ≥ 80 y                           | 21.85 (20.38-23.43) | < .001 | 17.99 (16.1-20.1)     | < .001 |
| Female sex                       | 1.38 (1.34-1.42)    | < .001 | 0.96 (0.93-0.99)      | .02    |
| Coronary heart disease           | 1.22 (1.16-1.28)    | < .001 |                       |        |
| Previous MI                      | 0.7 (0.62-0.79)     | < .001 | 0.81 (0.7-0.95)       | .01    |
| Diabetes                         | 1.4 (1.35-1.45)     | .001   |                       |        |
| Peripheral vascular disease      | 0.8 (0.76-0.85)     | < .001 | 0.84 (0.78-0.89)      | < .001 |
| Chronic kidney disease           | 1.37 (1.33-1.41)    | < .001 |                       |        |
| COPD                             | 1.12 (1.07-1.18)    | < .001 | 0.92 (0.87-0.98)      | .008   |
| Cancer                           | 1.71 (1.51-1.92)    | < .001 | 1.24 (1.07-1.44)      | .004   |
| Cerebrovascular disease          | 1.36 (1.26-1.47)    | < .001 |                       |        |
| Congestive cardiac failure       | 1.02 (0.99-1.07)    | .303   |                       |        |
| Dementia                         | 1.86 (1.24-2.77)    | < .001 |                       |        |
| Previous cardiac surgery         | 0.8 (0.73-0.86)     | < .001 | 0.82 (0.75-0.91)      | < .001 |
| Liver disease                    | 0.99 (0.9-1.09)     | .062   |                       |        |
| Charlson index                   |                     |        |                       |        |
| 3                                | 4.56 (4.26-4.66)    | < .001 | 1.08 (1.1-1.16)       | .03    |
| 4                                | 6.58 (6.28-6.89)    | < .001 | 1.08 (0.99-1.18)      | .076   |
| >4                               | 7.89 (7.51-8.28)    | < .001 | 1.09 (0.98-1.22)      | .127   |
| Nonelective procedure            | 0.88 (0.85-0.91)    | < .001 | 1.12 (1.07-1.17)      | < .001 |
| Hospital volume (vs high-volume) |                     |        |                       |        |
| Intermediate-high                | 0.68 (0.66-0.71)    | < .001 | 0.62 (0.64-0.69)      | < .001 |
| Intermediate-low                 | 0.6 (0.57-0.62)     | < .001 | 0.54 (0.52-0.57)      | < .001 |
| Low                              | 0.46 (0.44-0.48)    | < .001 | 0.42 (0.4-0.44)       | < .001 |

95%CI, 95% confidence interval; COPD, chronic obstructive pulmonary disease; MI, myocardial infarction; OR, odds ratio.

Data are expressed as ORs with 95%CI.

Univariate analysis: logistic regression. Multivariate analysis: stepwise logistic regression.

**Figure 1 of the supplementary data.** Distribution in the SAVR volume according to the mean number of procedures/y in each period. Box plots of the mean number of procedures/y in each period and in hospitals grouped according to the mean number of isolated SAVRs/y. Low-volume hospitals are those with a mean SAVR/y in the first quartile. Intermediate–low-volume hospitals are those with a mean SAVR/y in the second quartile. Intermediate–high-volume hospitals are those with a mean SAVR/y in the third quartile. High-volume hospitals are those with a mean SAVR/y in the fourth quartile. N, number of hospitals reporting to the CMBD; SAVR, surgical aortic valve replacement.

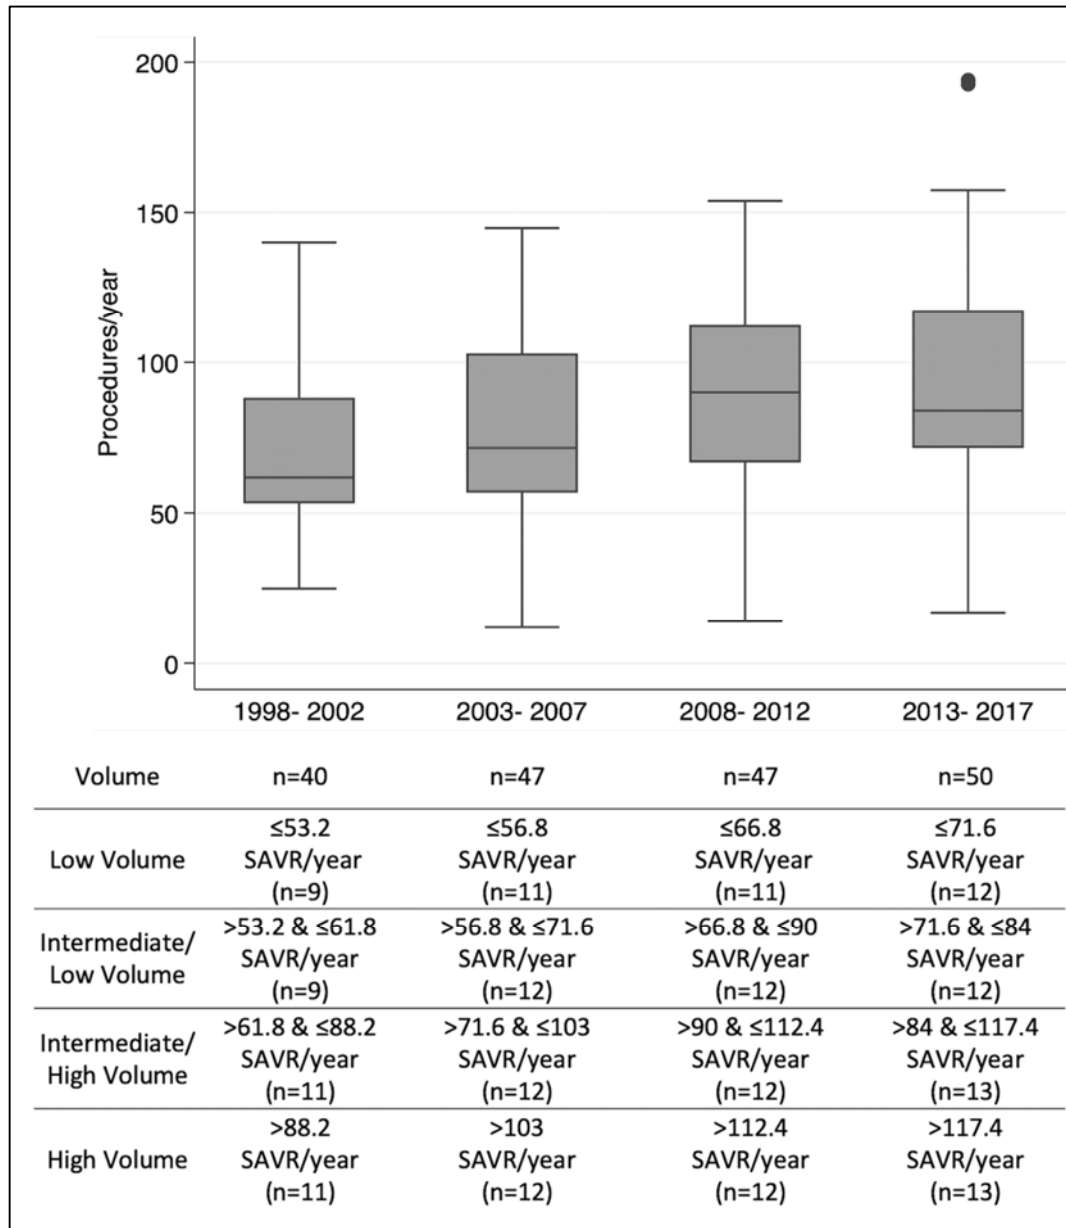

**Figure 2 of the supplementary data.** Joint regression analysis or mortality trend. \* indicates that the annual percentage change (APC) is significantly different from 0 at alpha level = 0.05.

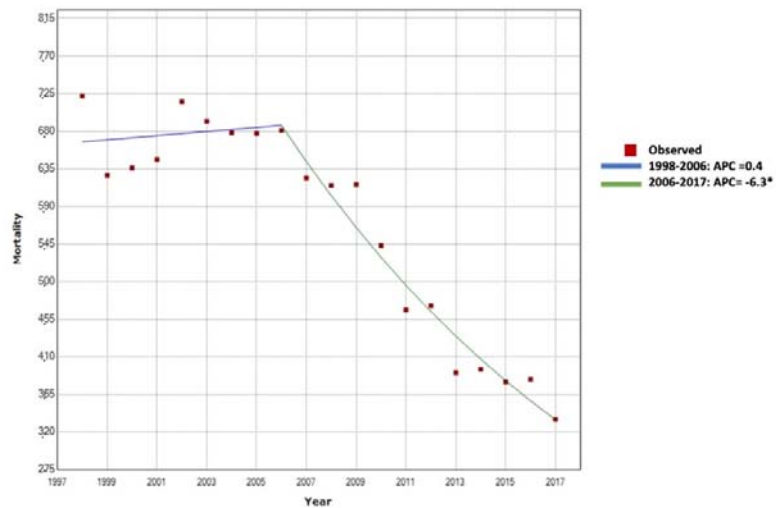

**Figure 3 of the supplementary data.** Risk-adjusted mortality ratio (RAMR) model with the area under the receiving operating characteristic curve. Variables included in the model to estimate expected mortality: age (by decade), sex, coronary disease, previous myocardial infarction, congestive cardiac failure, peripheral arterial disease, cerebrovascular disease, chronic kidney disease, modified Charlson score, type of admission, previous cardiac surgery, type of aortic prosthesis, hospital volume quartile, and autonomous community. AUC, 0.763; 95%CI, 0.761-0.765; Akaike information criterion, 27501.4.

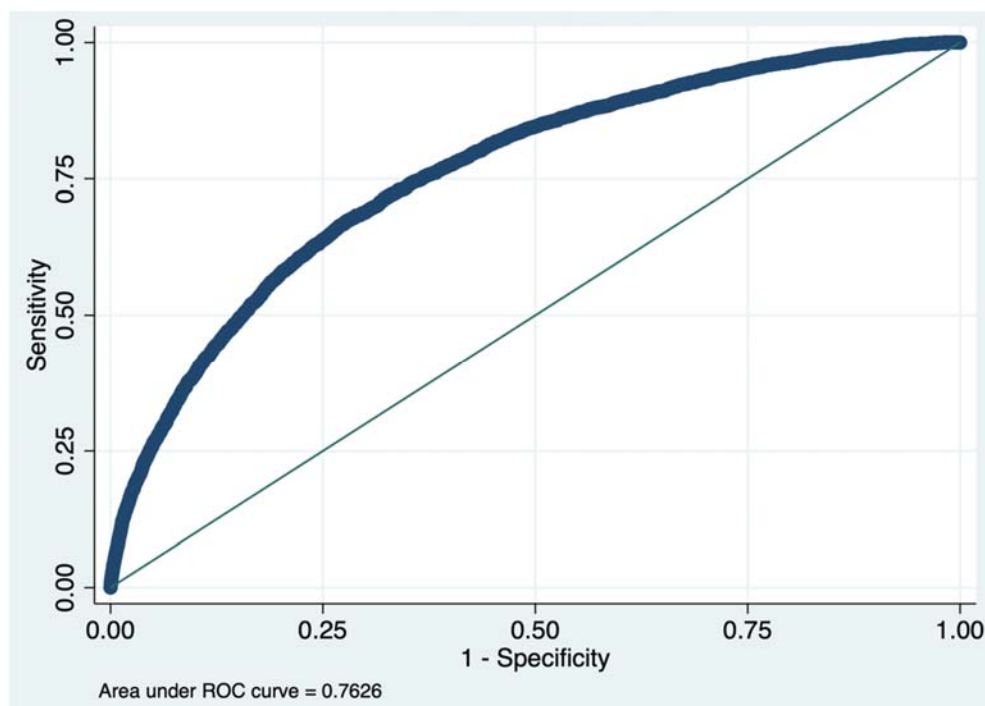

**Figure 4 of the supplementary data.** Changes in the proportion of bioprosthesis use among SAVR patients. A: proportion (%) of bioprostheses among patients younger and older than 65 years. In both age groups, an increase was observed in the use of tissue valves ( $P < .001$ ). B: proportion (%) of bioprostheses in the 4 periods of the study and according to the SAVR center volume. We detected an increase in the use of tissue valves in high-volume ( $P < .001$ ), intermediate-high-volume ( $P < .001$ ), intermediate-low-volume ( $P < .001$ ), and low-volume ( $P < .001$ ) centers. Within each period, we observed a linear statistically significant increase in the use of tissue valves in higher-volume centers.

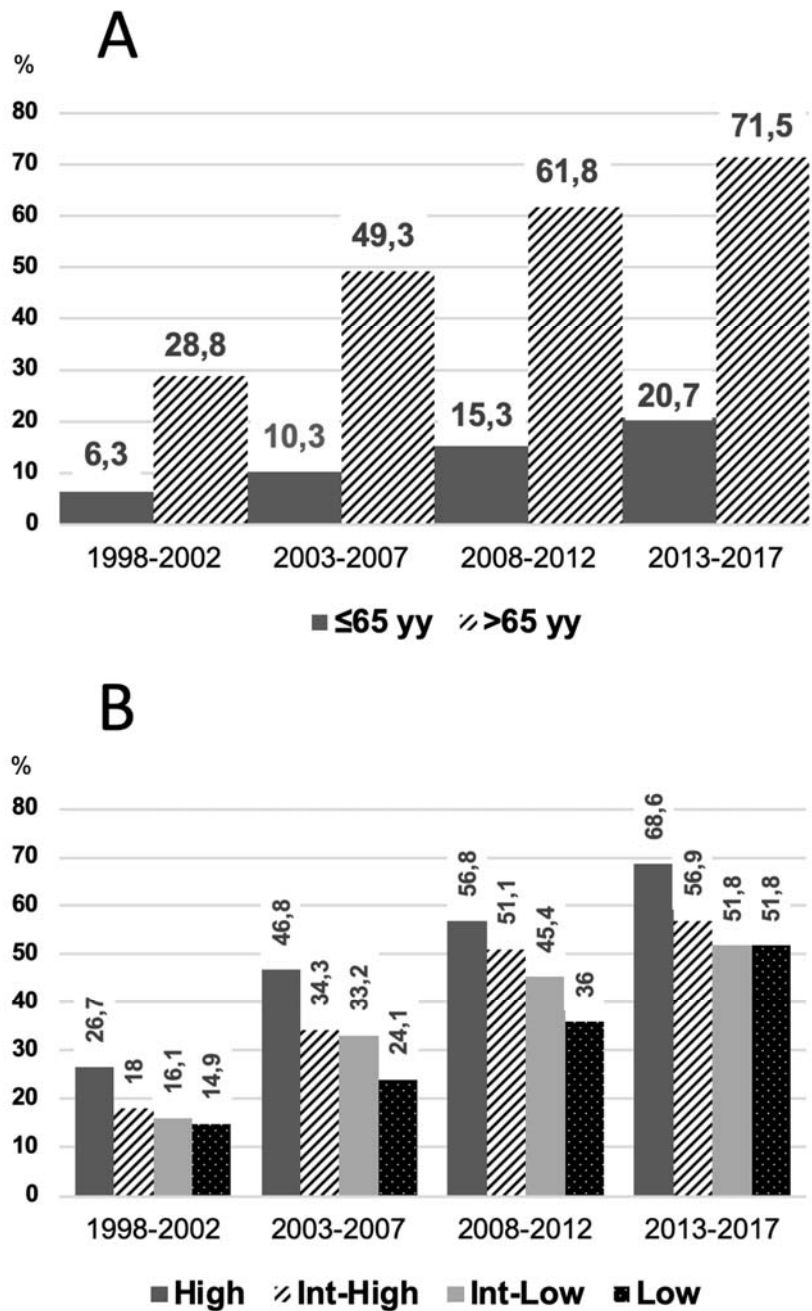

Supplement: mmc1 [file S0300893220303419:mmc1.pdf]
